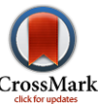

# Oleanolic Acid Controls Allergic and Inflammatory Responses in Experimental Allergic Conjunctivitis

Claudia Córdova<sup>1,9</sup>, Beatriz Gutiérrez<sup>1,9</sup>, Carmen Martínez-García<sup>2</sup>, Rubén Martín<sup>3</sup>, Patricia Gallego-Muñoz<sup>2</sup>, Marita Hernández<sup>1</sup>, María L. Nieto<sup>1\*</sup>

**1** Instituto de Biología y Genética Molecular, Consejo Superior de Investigaciones Científicas-Universidad de Valladolid, Valladolid, Spain, **2** Departamento de Biología Celular, Histología y Farmacología, Universidad de Valladolid, Valladolid, Spain, **3** Instituto de Ciencias del Corazón. Hospital Clínico Universitario, Valladolid, Spain

## Abstract

Pollen is the most common aeroallergen to cause seasonal conjunctivitis. The result of allergen exposure is a strong Th2-mediated response along with conjunctival mast cell degranulation and eosinophilic infiltration. Oleanolic acid (OA) is natural a triterpene that displays strong anti-inflammatory and immunomodulatory properties being an active anti-allergic molecule on hypersensitivity reaction models. However, its effect on inflammatory ocular disorders including conjunctivitis, has not yet been addressed. Hence, using a Ragweed pollen (RWP)-specific allergic conjunctivitis (EAC) mouse model we study here whether OA could modify responses associated to allergic processes. We found that OA treatment restricted mast cell degranulation and infiltration of eosinophils in conjunctival tissue and decreased allergen-specific Igs levels in EAC mice. Th2-type cytokines, secreted phospholipase A<sub>2</sub> type-IIA (sPLA<sub>2</sub>-IIA), and chemokines levels were also significantly diminished in the conjunctiva and serum of OA-treated EAC mice. Moreover, OA treatment also suppressed RWP-specific T-cell proliferation. In vitro studies, on relevant cells of the allergic process, revealed that OA reduced the proliferative and migratory response, as well as the synthesis of proinflammatory mediators on EoL-1 eosinophils and RBL-2H3 mast cells exposed to allergic and/or crucial inflammatory stimuli such as RWP, sPLA<sub>2</sub>-IIA or eotaxin. Taken together, these findings demonstrate the beneficial activity of OA in ocular allergic processes and may provide a new intervention strategy and potential therapy for allergic diseases.

**Citation:** Córdova C, Gutiérrez B, Martínez-García C, Martín R, Gallego-Muñoz P, et al. (2014) Oleanolic Acid Controls Allergic and Inflammatory Responses in Experimental Allergic Conjunctivitis. PLoS ONE 9(4): e91282. doi:10.1371/journal.pone.0091282

**Editor:** Hua Zhou, Macau University of Science and Technology, Macau

**Received:** November 12, 2013; **Accepted:** February 10, 2014; **Published:** April 3, 2014

**Copyright:** © 2014 Córdova et al. This is an open-access article distributed under the terms of the Creative Commons Attribution License, which permits unrestricted use, distribution, and reproduction in any medium, provided the original author and source are credited.

**Funding:** The study was supported by grants from the Spanish MINECO (reference SAF2009-08407). Patricia Gallego-Muñoz and Claudia Cordova were funded by the FPI Program from the Government of Castilla y León (co-funded by FSE). Rubén Martín was supported by the Sara Borrell Program from the Spanish MINECO. The funders had no role in study design, data collection and analysis, decision to publish, or preparation of the manuscript.

**Competing Interests:** The authors have declared that no competing interests exist.

\* E-mail: mlnieto@ibgm.uva.es

**9** These authors contributed equally to this work.

## Introduction

Allergic conjunctivitis (AC) is one of the most common ocular surface diseases. The disease encompasses a variety of pathological conditions, and based on immunopathological mechanisms, it can be subdivided into seasonal and perennial allergic conjunctivitis [1]. AC is an abnormal immune-hypersensitivity response to allergens mainly pollen, animal dander and house dust mites, although some food substances may also trigger it. They have common immunopathogenic mechanisms characterized by IgE-mediated mast cell degranulation and/or T-lymphocyte-mediated immune response. Allergen-specific Th2-type lymphocytes play important roles in the immunopathophysiology of allergic disorders because of their ability to produce IL-4, IL-5 and IL-13, which are involved in IgE production and eosinophil activation [2].

Medications for AC include drug treatment (anti-histamines, mast cell stabilizers, corticosteroids, non-steroidal anti-inflammatories, immunomodulators), and allergen-specific immunotherapy. However, its effectiveness can be endangered by adherence problems related to factors, such as discomfort associated with treatment administration, complexity of administration guidelines,

perception of a lack of efficacy at treatment initiation, and/or adverse effects. Therefore, the development of new therapeutic strategies will be a valuable tool to achieve better control of the disease and, thus, will improve healthcare outcome for patients with allergic conjunctivitis.

Because alternative treatments are needed, plants and other natural materials may prove to be valuable sources of useful new anti-allergic agents [3]. Research groups have conducted clinical trials with remedies from complementary and alternative medicine [4–7]. Plant formulations have demonstrated, in general, to be safe, revealing additional effects along with Western medicines such as synergism and modulation of the immune system. Triterpenes, including oleanolic acid (OA) are compounds that widely exist in the human diet, medicinal herbs and plants. OA has been identified in more than 120 plant species, including *olea europaea*, a plant that has gained more and more interest because of its multiple bioactive components [8]. Among the numerous beneficial effects, OA has been shown to have cardioprotective, antihypertensive, antiatherosclerotic, antihyperlipidemic and antioxidant activities, among other, as well as anti-inflammatory and immunomodulatory properties, being active on hypersensitivity reactions, such as the delayed-type hypersensitivity reaction, or

allergic asthma, and in Th1-mediated diseases, including experimental colitis and multiple sclerosis [9–16]. However, the effectiveness of OA in the treatment of ocular diseases such as allergic conjunctivitis is still unknown.

The IgE-mediated conjunctival allergic reaction can be reproduced easily in mice by using RWP as antigen [17]. The result is an early reaction followed by a predominant infiltration of eosinophilic inflammatory cells, which are the hallmark of allergic disease, and mast cell activation. This experimental allergic conjunctivitis (EAC) model mimics the pathological symptoms of AC in human, being a valuable tool to understand the pathogenesis of the disease, as well as for new drugs evaluation. The aim of this study was, therefore, to evaluate the effectiveness of OA using this well-characterized EAC model induced by RWP in BALB/c mice.

## Materials and Methods

### Disease Induction and Treatment

Animal care and experimental protocols were reviewed and approved by the Animal Ethics Committee of the University of Valladolid and complied the standards in the ARVO Statement. Mice (Charles River Laboratories, Barcelona, Spain) were housed in the animal facilities of the University of Valladolid and provided food and water ad libitum.

**Immunization.** EAC was induced in 6- to 7-week-old females BALB/c mice by intraperitoneal (i.p.) sensitization with 200  $\mu$ l from a mixture of 50  $\mu$ g RWP (Polyscience, Warrington, PA) in 0.25 ml Imject Alum (Thermo Scientific, Rockford, IL). Then, on day 10, mice were topically instilled into each eye with 1.25 mg of RWP in powder form [3,18]. Twenty-four hours later, eyes, blood and spleens were collected.

**Treatment.** Oleanolic acid (Extrasynthese, Genay Cedex, France) was dissolved in 2% w/v DMSO. Then, this stock solution was 10 times diluted to a working concentration of 2 mg/ml (0.2%, w/v DMSO final concentration), using a sterile saline solution (pre-warmed to 37°C) with mild shaking. Always, OA working solution was prepared fresh the day of the injection and sterile-filtered through a 0.22  $\mu$ m filter. OA (50 mg/kg body weight/day) was administered i.p. once a day from sensitization day (OA<sub>10</sub>) or 5 days after sensitization (OA<sub>5</sub>) as shown in Figure 1B (n = 10 per group). The molecular structure of OA is shown in Fig. 1A (OA molecular formula: C<sub>30</sub>H<sub>48</sub>O<sub>3</sub>, molecular weight: 456.70).

### Evaluation of Cell Infiltration

Eyes including eyelids and conjunctiva were exenterated and fixed in 4% paraformaldehyde for 24 h. Then, they were cut into cross sections 3- $\mu$ m thick and stained with toluidine blue and hematoxylin-eosine for detection of mast cells and eosinophils, respectively. In each section, infiltrating cells in the lamina propria mucosae of the palpebral and bulbar conjunctivas were counted by two masked observers. Palpebral zone: connective tissue between the epithelium and the Meibomio gland in the centre of the lid. Bulbar conjunctiva: near the cornea in reflection zone that form the conjunctival sac. In each slide there were two non-consecutive sections and three slides per eye and per stain were counted. An Olympus B-H (Olympus optical Co. LTD, Tokio, Japan) microscope and a micrometer ocular grid were used to evaluate the slides (magnification x400). Data are presented as mean  $\pm$  SD per mm<sup>2</sup>.

## Cytokines, Chemokines and RWP-specific IgS Quantitation

Serum was aliquoted and stored at  $-80^{\circ}$ C. Immunoplates (Nalge Nunc International, Naperville, IL) were coated with RWP (5 mg/ml) overnight at 4°C. After blocking with 1% BSA-PBS for 2 h, serum samples diluted 1:60 were added and incubated for 3 h. After washing, plates were incubated for 1 h with horseradish peroxidase-conjugated rat anti-mouse IgE, IgG, IgG1 or IgG2a antibodies (1:2000) from Serotec (Sigma-Aldrich, St Louis, MO). Color reaction was developed with 3,3',5,5'-tetramethyl-benzidine and stopped with 0.1N HCl. Data are expressed as mean optical density (OD) at 450 nm.

For cytokine and chemokine quantification - IL-10, IL-13, IL-33, monocyte chemoattractant protein-1 (MCP-1) and eotaxin - cell culture medium, serum and conjunctival tissue were analyzed by ELISA according to the manufacturer's protocols (eBioscience, San Diego, CA). Secreted phospholipase A<sub>2</sub>-typeIIA (sPLA<sub>2</sub>-IIA) levels were determined by commercial ELISA (USCNK Life Science Inc, Houston, TX). Conjunctival tissue was homogenized by using a tissue homogenizer (Cole-Parmer Instrument, Vernon Hills, IL) in an ice bath in 0.5 ml ice-cold PBS supplemented with 0.4 M NaCl, 0.05% Tween-20 and a protease inhibitor cocktail: 20 mg/ml of leupeptin, 20 KI units of aprotinin, 0.1 mM phenylmethylsulphonyl fluoride, and centrifuged for 10 min at 4°C. Supernatant were stored at  $-80^{\circ}$ C until cytokine assays were performed. Total protein was assayed using the Bradford method.

## Ex vivo Lymphoid Cell Culture and Analysis of Proliferation and Cytokine Production

To prepared single cell suspension, spleens were pressed through a wire mesh and then washed with ice-cold PBS. Red blood cells-depleted splenocytes ( $10 \times 10^6$  cells/ml) were cultured in triplicate in 96-well plates, and stimulated with medium alone or with 50  $\mu$ g/ml of RWP in presence or absence of different doses of OA. After 24 h, supernatants were harvested and concentrations of IL-33, IL-13 and MCP-1 were measured. Cells were prepared for proliferation analyses using the Promega kit, Cell Titer 96<sup>R</sup> Aqueous One Solution Cell Proliferation Assay (Promega Corporation, Madison, WI), according to the manufacturer's recommendations. Formazan product formation was determined by measuring the absorbance at 490 nm. Results were expressed as OD values, as an assessment of the number of metabolically active cells.

## In vitro Studies

**Cell culture.** The rat basophilic leukemia (RBL) mast cell line RBL-2H3 (kindly provided by Dr. Ruiz; Hospital Universitario Puerta del Mar, Facultad de Medicina, Universidad de Cádiz, Spain) was grown in EMEM supplemented with 15% heat-inactivated FCS, 0.1 mM nonessential amino acids, 50 U/ml penicillin, and 50  $\mu$ g/ml streptomycin [19].

The human eosinophilic cell line EoL-1 (kindly provided by Dr. Wicklein, University Medical-Center Hamburg-Eppendorf, Hamburg, Germany) was grown in RPMI 1640 medium, supplemented with 10% heat-inactivated FCS, 2 mM L-glutamine, 100 U/ml penicillin, and 100  $\mu$ g/ml streptomycin [20,21].

Both cell lines were cultured in standard conditions (37°C and 5% CO<sub>2</sub>).

**Proliferation assay.** The proliferative activity of EoL-1 and RBL-2H3 cells was quantified using the Promega kit, Cell Titer 96<sup>R</sup> Aqueous One Solution Cell Proliferation Assay, as described for the ex vivo proliferation assay. In brief, cells ( $1 \times 10^5$  cells/ml) were serum-starved for 24 h, incubated as indicated and measured. Results were expressed as OD values.

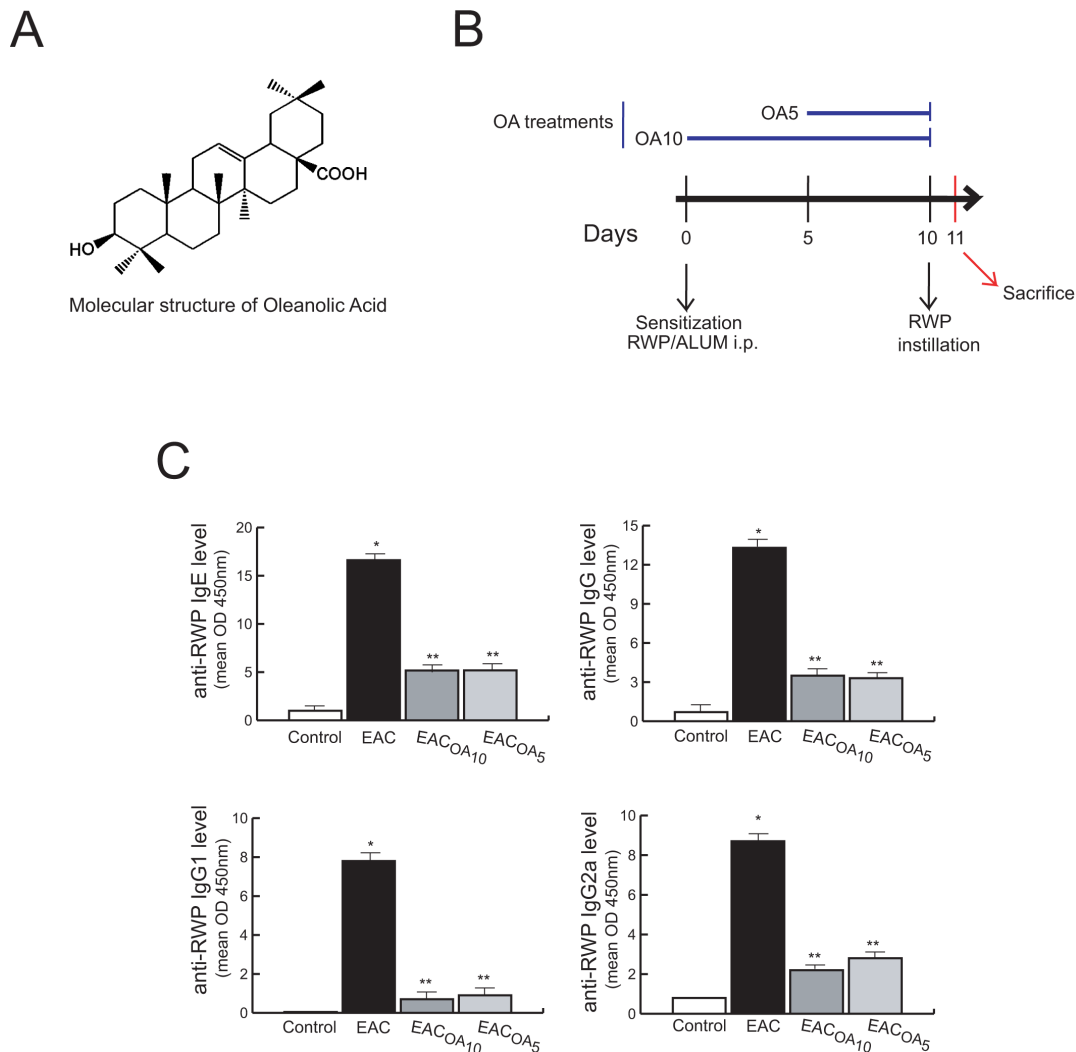

**Figure 1. Reduction of circulating anti-RWP antibodies in OA-treated mice.** Molecular structure of OA (A). Experimental protocol (B). BALB/c mice were sensitized on day 0 via i.p. injection with RWP emulsified in aluminum hydroxide. 10 days later, individual mice were challenged through ocular instillation with RWP. OA was administered i.p. at the sensitization day (OA<sub>10</sub>) or 5 days after sensitization (OA<sub>5</sub>). Animals were sacrificed 24 h after the challenge. (C) Titers of RWP-specific immunoglobulins in serum samples. \*P<0.001 versus control, and \*\*P<0.001 versus untreated EAC-mice.

doi:10.1371/journal.pone.0091282.g001

**Chemotaxis assay.** Cell migration was assayed using 24-well Transwell chambers with 8  $\mu$ m-pore polycarbonate filters. Lower wells were filled with medium containing eotaxin, sPLA<sub>2</sub>-IIA or vehicle, as indicated. Cells ( $1 \times 10^6$  cells/ml) were added to the upper chamber. When indicated, cells were treated with sPLA<sub>2</sub>-IIA, RWP or OA for 20 min at 37°C before seeding. Migration was allowed for 3–4 h at 37°C in 5% CO<sub>2</sub>. Migrated RHL-2H3 cells were fixed with 4% paraformaldehyde and stained with 0.1% Crystal Violet in 20% methanol-PBS for 3 minutes. The stain was solubilized and absorbance measured at 590 nm. Migrated EoL-1 cells were quantified by flow cytometry analysis. Chemotactic index was calculated from the number of cells migrating towards chemoattractant/number of cells migrating towards vehicle control.

**Flow cytometry of intracellular major basic protein (MBP).** EoL-1 cells were treated with butyric acid, or the stimuli eotaxin, RWP, sPLA<sub>2</sub>-IIA or combinations for 7 days. Then, cells were washed with 0.5% BSA-PBS, fixed with 4% paraformaldehyde for 30 min and permeabilized with 0.2%

Triton-X 100 in PBS for 10 min. Non-specific antibody binding was blocked by incubating cells with normal mouse IgG for 30 min. Then, cells were stained with an anti-MBP antibody (1:200) for 2 h. After washing, they were incubated with FITC-labeled goat anti-mouse IgG for 1 h at 4°C. Baseline fluorescence values were obtained by incubation with isotype mouse IgG antibody. After washing, the stained cells were analyzed using a Gallios Flow cytometer (Beckman Coulter), and acquisition and analysis were performed using CellQuest software. The data are presented as an average of mean intensity fluorescence (MIF).

#### Statistical Analysis

Statistical significance between groups was examined by one-way ANOVA using the GraphPad Prism Version 4 software (San Diego, CA). A post hoc analysis was made by the Bonferroni's multiple comparison test. P<0.05 was considered statistically significant.

## Results

### OA Treatment Inhibits RWP-specific Antibody Production in EAC Mice

To investigate whether OA treatment modulates adaptive immune response to conjunctival allergens, as well as the influence of the pre-treatment period in its effectiveness, EAC mice were treated with OA from sensitization day (OA<sub>10</sub>) or 5 days after sensitization (OA<sub>5</sub>) as shown in Figure 1B. The severity of EAC was elucidated by assessing RWP-specific IgE antibody levels in serum. The combination of systemic sensitization and local boosting with RWP resulted in significantly higher levels of Ag-specific IgE antibody secretion (Fig. 1C) compared with those in normal mice. However, the administration of OA, both under OA<sub>10</sub> and OA<sub>5</sub> protocols, led to a dramatic and similar reduction of Ag-specific IgE antibody levels (Fig. 1C). To address overall immunosuppression by OA, we also assessed levels of RWP-specific IgG, IgG1 and IgG2a antibodies in serum, finding similar results to those obtained for RWP-specific IgE antibodies. Taken together, these data suggest that oleanolic acid suppressed both allergen specific IgE production and overall immune responses.

### OA Treatment Attenuates Cellular Infiltration into Conjunctiva in EAC Mice

Histological findings demonstrated by toluidine blue staining the presence of numerous mast cells infiltrating lamina propria and stroma of conjunctiva in EAC mice, being most of them degranulated mast cells (Fig. 2A and C). In contrast, in the OA-treated EAC groups infiltrating mast cells were mainly granulated and the number of degranulated mast cells was significant lower, compared to untreated ones.

In the same way, hematoxylin-eosine staining revealed a significant infiltration of eosinophils in the conjunctiva of RWP-challenged mice 24 h after systemic priming (Fig. 2B and D). Interestingly, the number of eosinophils infiltrating the conjunctiva after allergen challenge was minimal in mice treated with OA.

Mast cell and eosinophil counts were not significantly different between EAC mice injected with either oleanolic acid regimens (OA<sub>10</sub> or OA<sub>5</sub>).

### OA Treatment Reduces the Release of EAC-associated Cytokines and Chemokines

Th2-associated cytokines and chemokines are typically secreted in allergic reactions. To evaluate the effect of OA on cytokine secretion, levels of IL-13 and IL-33 were investigated in serum and conjunctival tissue by commercial ELISAs. As shown in Figure 3A and B, IL-33 and IL-13 were remarkably up-regulated in the allergic state and OA treatment diminished their expression levels.

We also evaluated the presence of IL-10, a known suppressive cytokine of T-cell proliferation and cytokine production, in normal, allergic and OA-treated allergic mice. We found that IL-10 levels in serum and tissue were significantly diminished in the allergic state, but were up-regulated reaching values of the normal state, in OA-treated EAC mice.

Production and build up of sPLA<sub>2</sub>-IIA, an acute-phase reactant associated with a number of inflammatory, autoimmune, and allergic diseases, was also evaluated [22]. sPLA<sub>2</sub>-IIA was augmented in serum and conjunctivas of mice from the untreated-EAC group, compared with the healthy-control group (Fig. 3A and B). However, and according to Th2-type cytokines data, we found that this inflammatory protein was significantly lower in OA-treated EAC mice, at both systemic and local level.

Moreover, we also measured the concentration of two chemokines: eotaxin, given its critical role in eosinophil recruitment, Th2-related cytokines production and mast cell priming; and MCP-1, which is essential for mast cell-mediated acute inflammatory responses [23]. Again, we observed that OA treatment suppressed the high levels of eotaxin and MCP-1 found in sera and conjunctivas of allergic mice (Fig. 3C and D).

There was no difference in regulating these conjunctivitis-associated markers between the two treatment protocols: EAC<sub>OA5</sub> and EAC<sub>OA10</sub>.

### OA Treatment Regulates T Cell Responses in EAC

Next, to investigate whether OA treatment inhibits EAC by modifying/affecting systemic immune responses, we evaluated the function of splenocytes harvested from mice of the four experimental groups.

Spleen cells were assessed for antigen-specific proliferation and cytokine secretion after *in vitro* stimulation with RWP in the presence or absence of different doses of OA. RWP-specific proliferative response, as well as IL-13, IL-33 and MCP-1 production were significantly increased in spleen cells from mice with EAC, and addition of OA markedly suppressed, in a dose-dependent manner, these ex-vivo responses to the allergen (Fig. 4, A and C). In contrast, splenocytes isolated from healthy-control mice did not respond to *in vitro* RWP challenge, and no major responses were detected in spleen cells from EAC<sub>OA10</sub> and EAC<sub>OA5</sub> mice (Fig. 4, B and D).

### OA Inhibits *in vitro* Functional Activation of Allergy-related Cells

We next investigated whether the anti-inflammatory effect found *in vivo*, in OA-treated EAC mice, comprises also direct *in vitro* actions on cells particularly important for the development of allergic disorders. Therefore, the well-characterized eosinophil cell line EoL-1 and RBL-2H3 mast cells were used to mimic responses activated on ocular allergic reactions.

**Proliferation and survival.** EoL-1 eosinophils and RBL-2H3 mast cells were treated with different concentrations of RWP or eotaxin in presence or absence of either 5 or 10  $\mu$ M of OA for 24 h. As shown in Figure 5A and B, the presence of OA significantly reduced, the proliferative response induced by the agonists, in a dose-dependent manner. The presence of OA had no significant influence on the viability of either resting or activated cells.

**Chemotactic migration.** The capacity of OA to modulate EoL-1 eosinophils and RBL-2H3 mast cells migration was assessed using Transwell chambers. As shown in Fig. 5C and D, cell pretreatment with OA reduced in a dose-dependent manner the chemotactic activity of eotaxin in both cell lines.

We also assessed the capacity of sPLA<sub>2</sub>-IIA, found up-regulated in EAC mice, and RWP to elicit and/or modify chemotactic migration. As schematically colored-indicated in Figure 6, sPLA<sub>2</sub>-IIA added in the lower compartment of transwell chamber induced a significant increase in EoL-1 eosinophils (Fig. 6A) and RBL-2H3 mast cells (Fig. 6B) migration over controls. In addition, both sPLA<sub>2</sub>-IIA- and RWP-cell pretreatment potently stimulated both spontaneous and chemoattractant-induced cell migration.

Then, we investigated the effects of OA, and we observed that cell migration was potently inhibited when cells were pre-incubated with OA. Addition of OA to the lower chamber had no detectable effect on cell motility (data not shown).

**EoL-1 eosinophils differentiation.** Differentiation of EoL-1 cells was triggered chemically with butyric acid, or with stimuli such as eotaxin, RWP and sPLA<sub>2</sub>-IIA, and the expression of MBP,

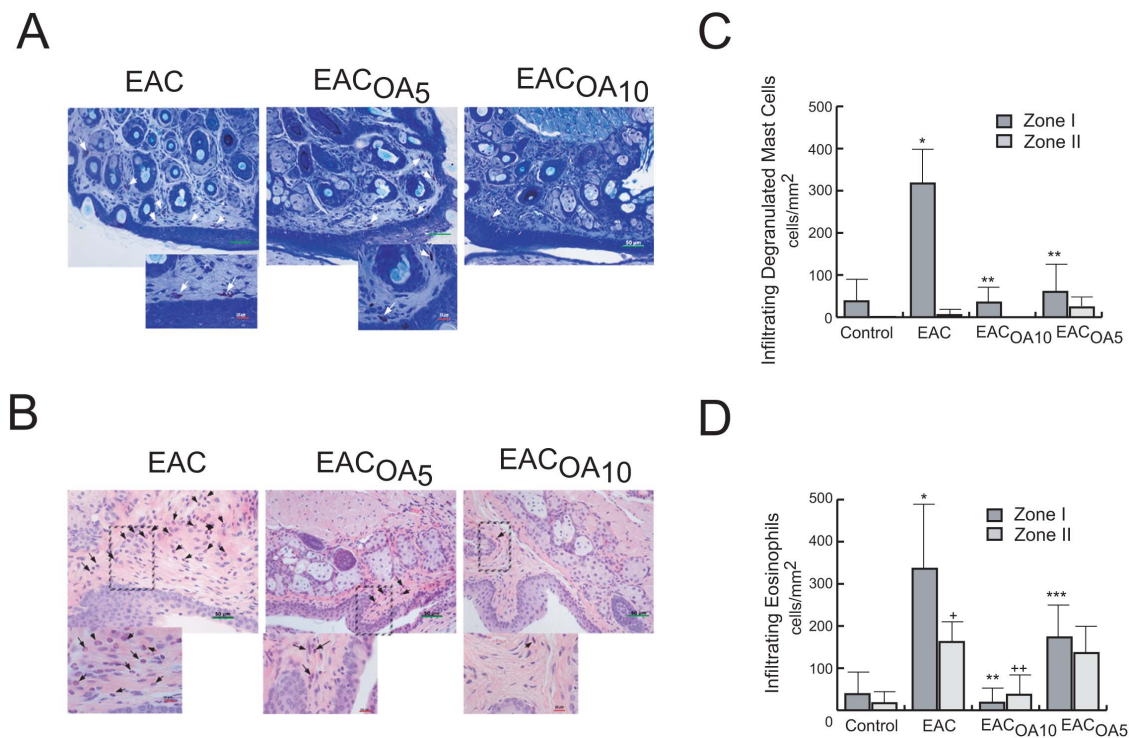

**Figure 2. OA administration prevents development of allergic conjunctival inflammation.** Light micrograph of conjunctival sections in mice from allergic untreated, OA<sub>5</sub>-treated and OA<sub>10</sub>-treated groups. Representative toluidine (A) and H-E (B) stained sections showed infiltration in palpebral conjunctiva of mast cells and eosinophils, respectively. (C, D) Number of degranulated mast cells/mm<sup>2</sup> and eosinophils/mm<sup>2</sup>, respectively. In images, green bars = 50  $\mu$ m. In inserts, red bars = 10  $\mu$ m. \* and \*\* $P < 0.01$  ( $n = 10$ , three independent experiments). Zone I: conjunctiva palpebralis. Zone II: conjunctiva bulbaris. \* and \*\* $P < 0.001$  versus control zone I and zone II, respectively; \*\* and \*\*\* $P < 0.001$  versus untreated EAC-mice zone I and zone II, respectively; and \*\*\* $P < 0.01$  versus untreated EAC-mice zone I. doi:10.1371/journal.pone.0091282.g002

a mature eosinophil marker, was evaluated by flow cytometry. As shown in Figure 7A all the agonists on their own promoted the upregulation of MBP at day 7 after treatment. Interestingly, when the agonists eotaxin, RWP, or sPLA<sub>2</sub>-IIA were added in combination with butyric acid, the differentiation process was significantly increased over butyric acid alone. As expected, the presence of OA before incubation the cells with the agonists, abrogated the differentiation process (Fig. 7B).

## Discussion

OA is a powerful anti-inflammatory agent, whose activity in ocular inflammatory disorders has never been investigated. Here, we examined the effect of OA on allergic conjunctivitis in a RWP-induced EAC model as well as its effects in vitro on eosinophils and mast cells functions. We focused on these cells since they are important mediators in the development of allergic diseases and inflammatory processes.

Intraperitoneal administration of OA, either on the sensitization day or 5 days after sensitization to an EAC model, provided strong evidence of its anti-allergic effects; while, its administration to healthy BALB/c mice did not induce signs of any pro-inflammatory response (data not shown), as found in other experimental mice models [14,15]. The main pathophysiological changes in conjunctival allergic reactions include preferential generation of IgE antibodies in serum, as well as IgE-dependent mast cell degranulation and infiltration of eosinophils into the conjunctiva [24]. Our mouse model displayed these pathological hallmarks, and OA treatment effectively reduced the number of eosinophils and degranulated mast cells in the conjunctival tissue,

and suppressed the presence of allergen-specific Igs titers in serum, showing no remarkable difference in the degree of suppression of these features between the two OA administration protocols. These findings were consistent with the decreased levels of inflammatory mediators and Th2 cytokine found in the OA-treated mice (EAC<sub>OA10</sub> and EAC<sub>OA5</sub>).

The pathological processes of an allergic reaction are thought to be mediated by Th2-type cells which release interleukins such as IL-5 and IL-13. These cytokines are responsible for a cascade of events necessary for allergic inflammation: IgE production by B-cells, eosinophil activation and recruitment, and mast cell activation. IL-13 is a crucial mediator of hypersensitivity reactions [25–29]. Different studies in murine models of allergen challenge have shown that IL-13 is a critical factor to induce responses that have a striking resemblance to human diseases. IL-13 regulates synthesis of IgE and coordinates the inflammatory process due to its ability to stimulate expression of adhesion molecules, chemokines and metalloproteinases, which influence the recruitment, trafficking and activation of many inflammatory cells. Meanwhile, IL-33 is another powerful inducer of allergic inflammation which has been found highly expressed in Th2-associated diseases including asthma, allergic conjunctivitis and rhinitis [30,31]. IL-33 promotes responses which include activation and migration of Th2 lymphocytes, eosinophils, mast cells and basophiles.

Our data clearly demonstrated that the expected increased levels of IL-13, and IL-33 in the conjunctival tissue and serum of EAC mice were markedly suppressed by OA treatment. Likewise, we did see an allergen-induced increase in the release of these cytokines in splenocytes cultures after allergen challenge. Treat-



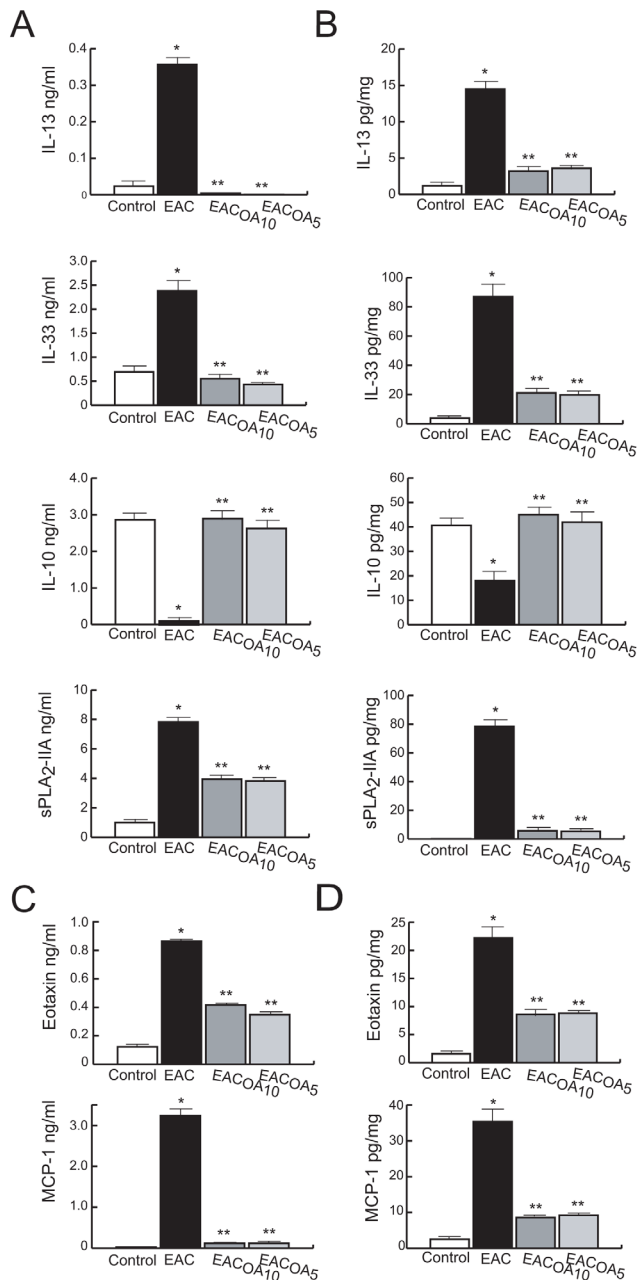

**Figure 3. Effect of OA on cytokine and chemokine levels in EAC mice.** The cytokines IL-13, IL-33, IL-10 and sPLA<sub>2</sub>-IIA (A,B), as well as the chemokines eotaxin and MCP-1 (C,D) were quantified in serum samples (A,C) and ocular conjunctiva extracts (B,D) from mice of the indicated groups 24 h after challenge. Results were expressed as the mean  $\pm$  SD (n=7/group). \*P<0.001 vs control, and \*\*P<0.001 vs untreated-EAC mice.

doi:10.1371/journal.pone.0091282.g003

ment with OA, both in vivo and in vitro, significantly reduced IL-13 and IL-33 cytokine production. Additionally, examination of chemokine induction revealed that the upregulated levels of eotaxin and MCP-1, in both serum and the conjunctiva of sensitized mice after allergen challenge, were substantially decreased in OA-treated mice. Similar results were found in vitro: splenocytes from the different experimental groups also showed a substantial reduction in the allergen-induced eotaxin and MCP-1 by the action of OA, along with a minimization of the proliferative

response of these T-cell cultures. All of this suggests that OA was able not only to down-modulate both the systemic and local allergen-induced inflammatory response, but also to impair allergen-induced T cell responses in vivo and in vitro.

IL-13 has been shown to regulate the expression of MCP-1 and eotaxin in the respiratory and gastrointestinal mucosa, and exogenous application of IL-33 to an EAC model strongly induces local production of the chemoattractant eotaxin, and potentiates the capacity of Th2 cells to produce cytokines including IL-13 [30,32–36]. At the same time, eotaxin-1 is considered as the most relevant chemokine in the pathophysiology of allergic conditions, because of its contribution to eosinophil homing or allergen-dependent chemoattraction and its regulatory function in mast cells at the ocular tissue regulating both IgE-induced degranulation and presumably maturation [30]. Therefore, the reduced presence of eosinophils and degranulated mast cells, in the conjunctiva of the OA-treated EAC mice treated, might be closely linked to the decreased expression of IL-13, IL-33 and eotaxin, all of which were clearly down-modulated by OA. Similarly, the improvement of allergic conjunctivitis in mice subjected to treatment with natural products such as curcumin or thymoquinone, an anti-oxidant and anti-inflammatory active component of *Nigella sativa*, has also been linked to its capacity to suppress Th2-driven immune responses [37,38].

Another finding was that treatment of EAC mice with OA prevented the diminished secretion of IL-10 observed in untreated-EAC mice. In fact, the expression levels in serum and conjunctival tissue of this Treg-type cytokine involved in the Th1/Th2 homeostasis were similar in OA-treated EAC mice and in healthy control mice. It is noteworthy that in addition to its anti-inflammatory properties on human mast cells, IL-10 has recently been shown to stabilize murine mast cells and reduce their degranulation in vitro [39,40]. Data which are in accordance with an in vivo study in a rodent model, which report that IL-10 attenuates allergic conjunctivitis by protecting from mast cell activation/degranulation, instead of affecting its numbers in the conjunctiva [40]. Similarly, our study neither revealed significant differences in the number of mast cells in the conjunctiva between untreated- and OA-treated-EAC mice (data not shown), but rather OA treatment prevented from mast cells degranulation.

In addition, we found an increased presence of sPLA<sub>2</sub>-IIA in serum and conjunctiva of allergic mice as compared to control healthy mice, and the administration of OA again abrogated this augmented expression. High concentrations of sPLA<sub>2</sub>-IIA have already been found in the tears of patients with AC both seasonal and perennial, dry eye disease, chronic blepharitis and contact lens intolerance, when compared to tears of age-matched normal controls [41–43]. Recently, a dry eye experimental model in mice has revealed increased expression of sPLA<sub>2</sub>-IIA in the goblet, as well as in epithelial cells associated with the signs and symptoms of the diseases [22]. sPLA<sub>2</sub>-IIA in the normal ocular surface was shown to be an innate immune barrier of the ocular surface against microbial infection, but when the ocular surface is compromised, it amplifies the inflammatory process [22,43]. These findings might support the hypothesis that the elevated levels of sPLA<sub>2</sub>-IIA on conjunctiva of our EAC model might play an important role triggering ocular inflammation by affecting to the conjunctiva epithelial cells. Consequently, lowering its presence by the administration of OA should result in a diminished, or abrogated, ocular surface inflammation.

In our study we also demonstrated sPLA<sub>2</sub>-IIA- and allergen-specific signals in eosinophils and mast cells, which are abolished by the presence of OA. We focused on these cell-types because of its significant contribution to the development of AC due to its

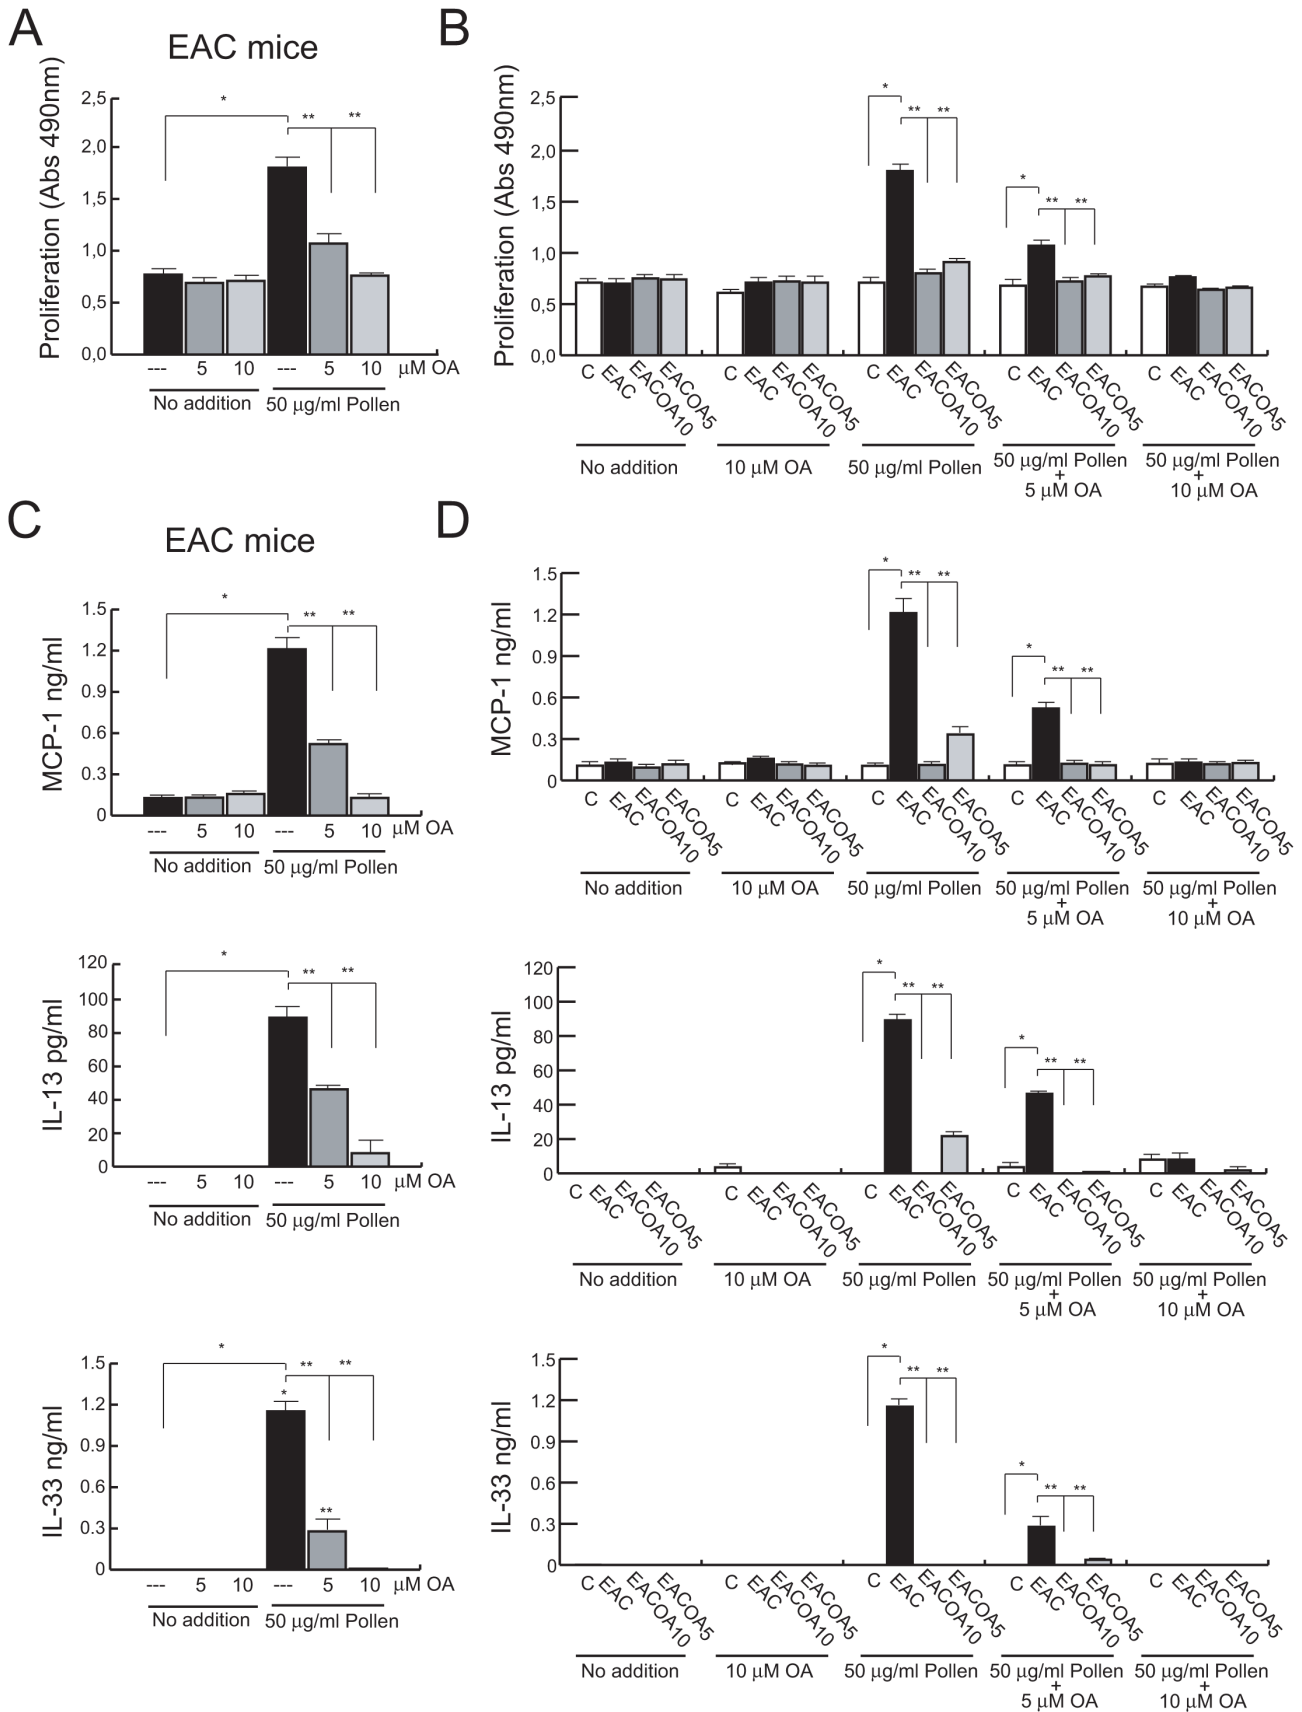

**Figure 4. Effect of OA on splenocyte functions.** RWP-specific proliferative responses of splenic cells from untreated-EAC mice (A), and from mice of the indicated groups (B). Cells were treated for 24 h with 50 μg/ml of RWP in presence or absence of the indicated doses of OA, and proliferation

was measured. Each bar represents the mean  $\pm$  SD. (C and D) Quantification of IL-13, IL-33, and MCP-1 in supernatants from (A) and (B). Bars represents means  $\pm$  SD. (n=5). \* and \*\*P<0.001. doi:10.1371/journal.pone.0091282.g004

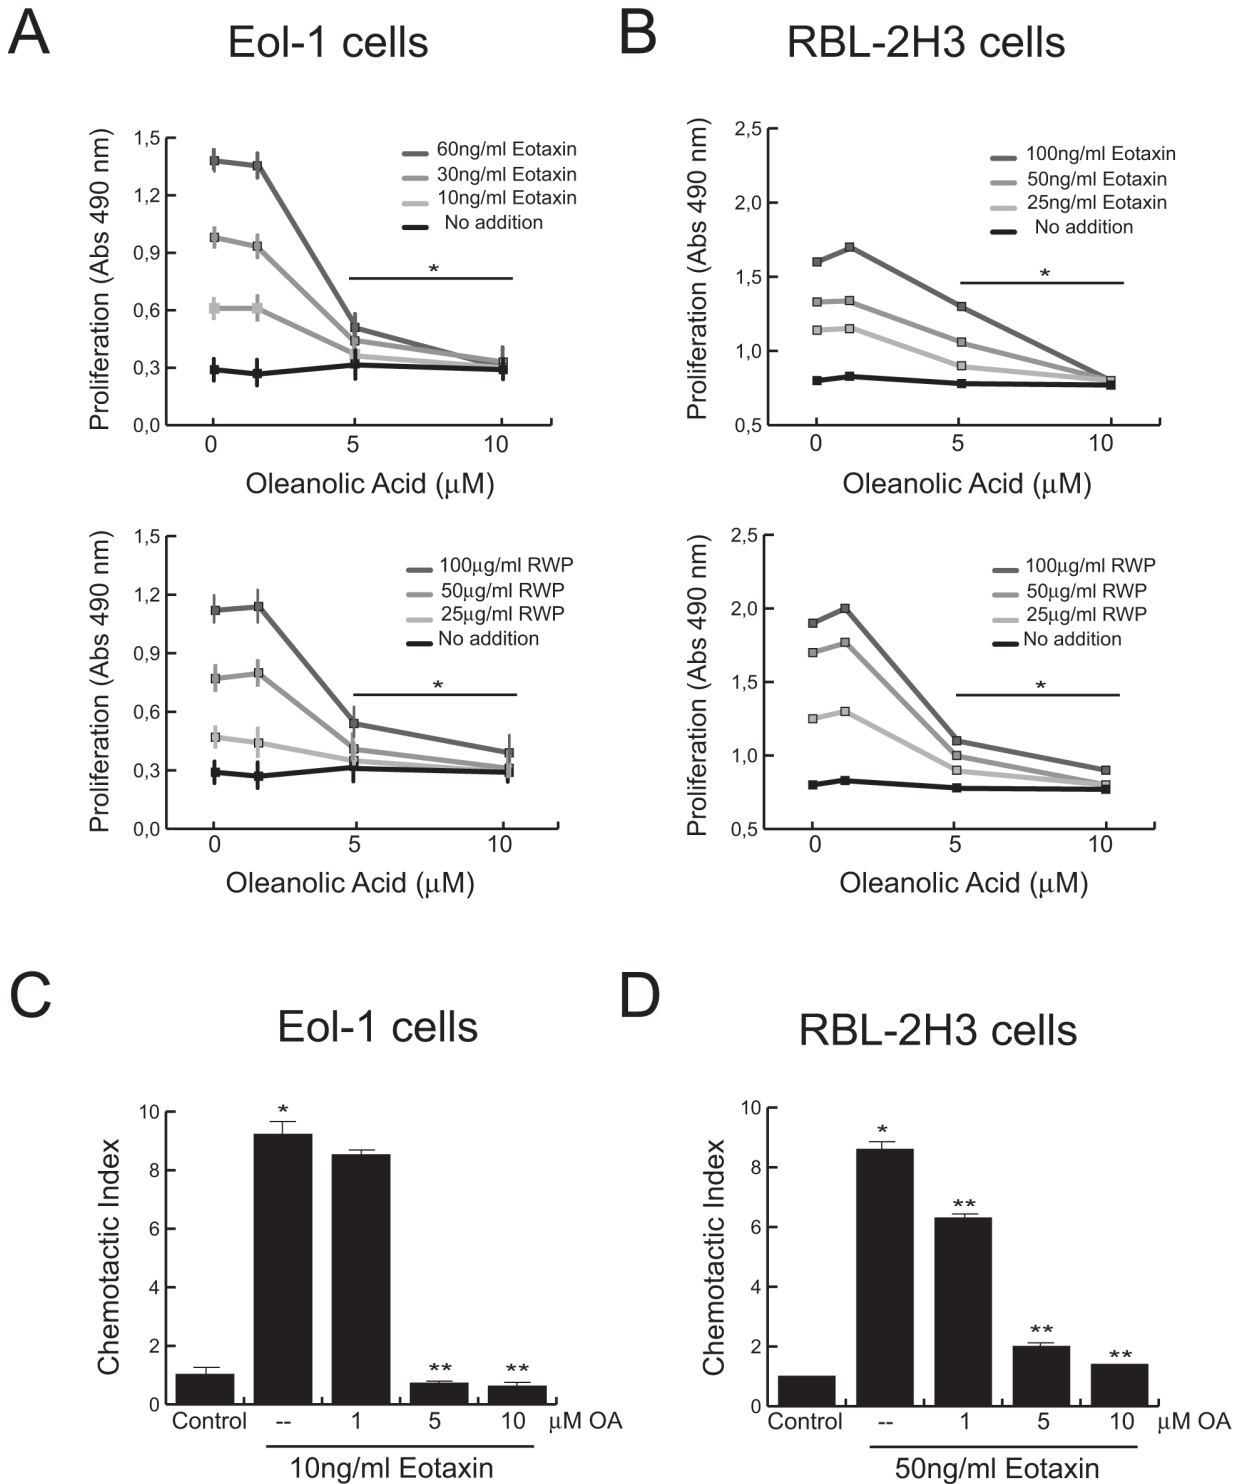

**Figure 5. OA abrogated *in vitro* biological functions on EoL-1 and RBL-2H3 cells.** EoL-1 (A,C) and RBL-2H3 (B,D) cells were incubated with the indicated stimuli in presence or absence of different concentrations of OA. (A,B) Cell proliferation was assayed 24 h after stimulation. (C,D) Cell migration was measured as described in Materials and Methods. Bars represent means  $\pm$  SD. (\*P<0.001 vs unstimulated cells; \*\*P<0.001 vs stimuli without triterpene; n=3). doi:10.1371/journal.pone.0091282.g005



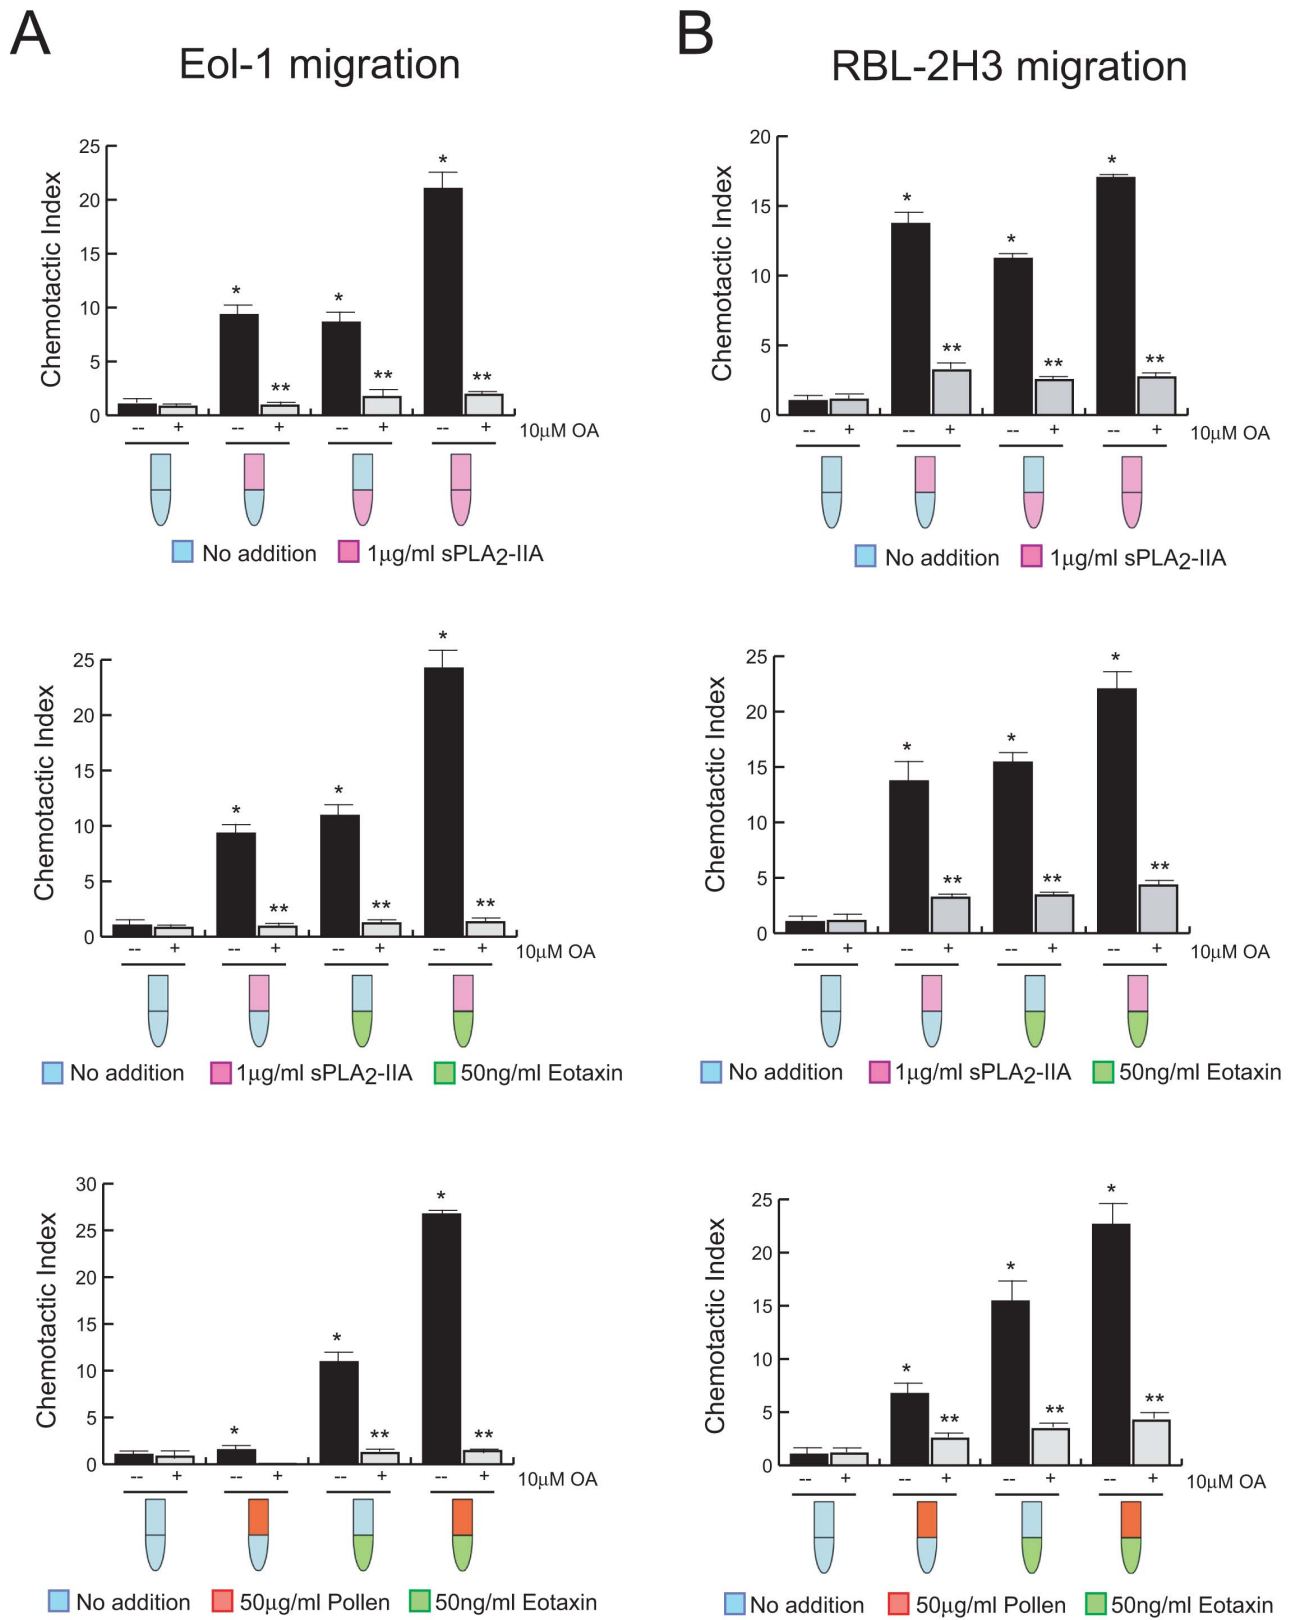

**Figure 6. OA inhibits cell migration.** EoL-1 (A) and RBL-2H3 (B) cells treated, or not, with 10 μM of OA for 30 min, were allowed to migrate as described in Materials and Methods. Cell migration was assayed using eotaxin, RWP and sPLA<sub>2</sub>-IIA as schematically indicated by the green, red and pink color, respectively. Bars represent means ± SD. (\*P<0.001 vs untreated control condition, and \*\*P<0.001 vs stimuli without triterpene; n=3). doi:10.1371/journal.pone.0091282.g006

A

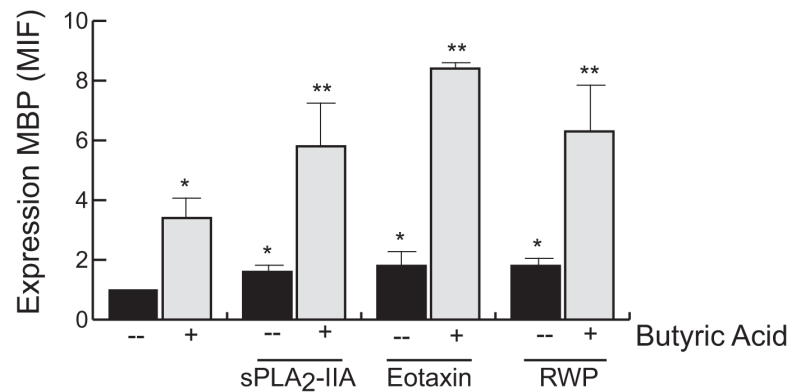

B

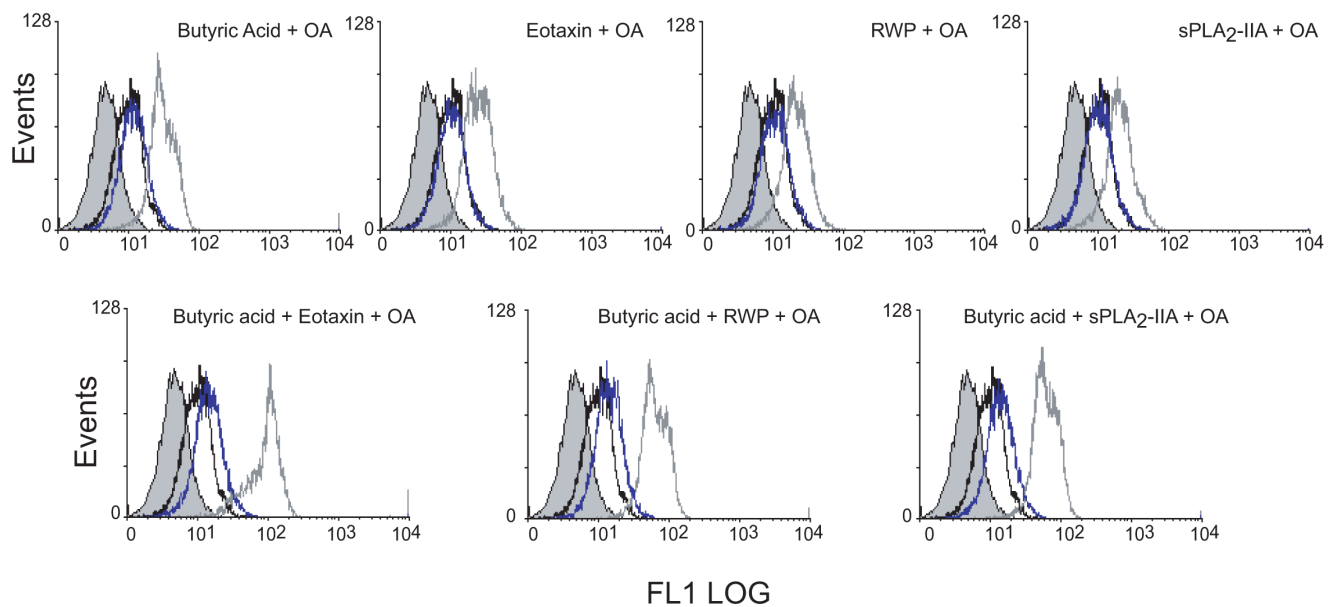

**Figure 7. Effect OA on EoL-1 cell differentiation.** EoL-1 cells were treated without and with 0.5 mM butyric acid, and 30 ng/ml of eotaxin, or 1  $\mu$ g/ml sPLA<sub>2</sub>-IIA or 50  $\mu$ g/ml RWP for 7 days, in absence (A) or presence of 5  $\mu$ M OA (B). MBP expression was analyzed by Flow cytometry. In A, data are expressed as the means of MFI  $\pm$  SD. \* $P$ <0.001 vs control cells, and \*\* $P$ <0.01 vs butyric acid-treated cells;  $n$ =3. In B, histograms are representative of three independent experiments: untreated (open black curves), stimulated (open dark grey curves) and OA-stimulated (open blue curves). EoL-1 cells are compared with isotype controls (solid grey curves). doi:10.1371/journal.pone.0091282.g007

cytotoxic and inflammatory effects by the release of their granule proteins and the production of crucial inflammatory mediators. We showed that sPLA<sub>2</sub>-IIA behaves as a chemoattractant for EoL-1 eosinophils and RBL-2H3 mast cells as potent as eotaxin, and amplifies eotaxin-induced chemotaxis similarly to what is observed with direct interaction of cells with RWP. These results are inline with previous studies demonstrating cooperative chemotactic responses between eotaxin and the cytokine IL-5 [44]. Thus, suggesting that diverse inflammatory mediators, including sPLA<sub>2</sub>-IIA, may act cooperatively to potentiate local chemotactic responses. In addition, the phospholipase has been shown to effectively trigger mast cell degranulation, and here we found that it enhanced EoL-1 cells to undergo morphological differentiation

into mature eosinophil-like cells [45]. Interestingly, all the studied responses were abolished in cells pretreated with OA. Therefore, our data point to a critical role for sPLA<sub>2</sub>-IIA in the activity and migratory capability into tissues of eosinophils and mast cells, and a regulatory role for the triterpene OA in the prevention of cell recruitment and activation. However, signaling pathways involved in these events remain obscure and deserve a further and deeper investigation.

In conclusion, OA seems to be a promising candidate for the treatment of allergic eye disorders in addition to the conventional therapies. It provided an effective treatment against the allergic and immune-inflammatory responses in the EAC model. Thus, the therapeutic potential for the treatment of allergic inflammatory

diseases such as allergic rhinitis and asthma should be also considered. Further studies should also be directed to explore its activity when administered topically.

## Acknowledgments

We gratefully acknowledge Roberto Cantalapiedra Rodríguez by his technical assistance.

## References

- Leonardo A, Bogacka E, Fauquert JL, Kowalski ML, Groblewska A, et al. (2012) Ocular allergy: recognizing and diagnosing hypersensitivity disorders of the ocular surface. *Allergy* 67: 1327–1337.
- Sánchez MC, Fernández Parra B, Matheu V, Navarro A, Ibáñez MD, et al. (2011) Allergic Conjunctivitis. *J Investig Allergol Clin Immunol*. 21: 1–19.
- Cota BB, Bertollo CM, de Oliveira DM (2013) Anti-allergic potential of herbs and herbal natural products - activities and patents. *Recent Pat Endocr Metab Immune Drug Discov* 7: 26–56.
- Mainardi T, Kapoor S, Bielory L (2009) Complementary and alternative medicine: herbs, phytochemicals and vitamins and their immunologic effects. *J Allergy Clin Immunol* 123: 283–294.
- Bielory L, Heimall J (2003) Review of complementary and alternative medicine in treatment of ocular allergies. *Curr Opin Allergy Clin Immunol* 3: 395–399.
- Lee DK, Carstairs JJ, Haggart K, Jackson CM, Currie GP, et al. (2003) Butterbur, a herbal remedy, attenuates adenosine monophosphate induced nasal responsiveness in seasonal allergic rhinitis. *Clin Exp Allergy* 33: 882–886.
- Schempp CM, Windeck T, Hezel S, Simon JC (2003) Topical treatment of atopic dermatitis with St. John's wort cream—a randomized, placebo controlled, double blind half-side comparison. *Phytomedicine* 10: 31–37.
- Price KR, Johnson IT, Fenwick RR (1987) The chemistry and biological significance of saponins in foods and feeding stuffs. *CRC Cr Rev Food Sci* 26: 27–135.
- Somova LO, Nadar A, Rammanan P, Shode FO (2003) Cardiovascular, antihyperlipidemic and antioxidant effects of oleanolic and ursolic acids in experimental hypertension. *Phytomedicine* 10: 115–121.
- Somova LI, Shode FO, Rammanan P, Nadar A (2003) Antihypertensive, antiatherosclerotic and antioxidant activity of triterpenoids isolated from *Olea europaea*, subspecies *africana* leaves. *J Ethnopharmacol* 84: 299–305.
- Rios JL (2010) Effects of triterpenes on the immune system. *J Ethnopharmacol* 128: 1–14.
- Liu J (1995) Pharmacology of oleanolic acid and ursolic acid. *J Ethnopharmacol* 49: 57–68.
- Giner-Larza EM, Mániz S, Recio MC, Giner RM, Prieto JM, et al. (2001) Oleanonic acid, a 3-oxotriterpene from *Pistacia*, inhibits leukotriene synthesis and has anti-inflammatory activity. *Eur J Pharmacol* 428: 137–143.
- Martín R, Hernández M, Córdova C, Nieto ML (2012) Natural triterpenes modulate immune-inflammatory markers of experimental autoimmune encephalomyelitis: therapeutic implications for multiple sclerosis. *Br J Pharmacol* 166: 1708–1723.
- Martín R, Carvalho-Tavares J, Hernández M, Arnés M, Ruiz-Gutiérrez V, et al. (2010) Beneficial actions of oleanolic acid in an experimental model of multiple sclerosis: a potential therapeutic role. *Biochem Pharmacol* 15: 198–208.
- Cipriani S, Mencarelli A, Chini MG, Distrutti E, Renga B, et al. (2011) The bile acid receptor GPBAR-1 (TGR5) modulates integrity of intestinal barrier and immune response to experimental colitis. *PLoS One* 6: e25637.
- Magone MT, Chan CC, Rizzo LV, Kozhich AT, Whitcup SM (1998) A novel murine model of allergic conjunctivitis. *Clin Immunol Immunopathol* 87: 75–84.
- Fukushima A, Yamaguchi T, Ishida W, Fukata K, Ueno H (2006) TLR2 agonist ameliorates murine experimental allergic conjunctivitis by inducing CD4 positive T-cell apoptosis rather than by affecting the Th1/Th2 balance. *Biochem Biophys Res Commun* 339: 1048–1055.
- Barsumian EL, Isersky C, Petrino MG, Siraganian RP (1981) IgE-induced histamine release from rat basophilic leukemia cell lines: isolation of releasing and nonreleasing clones. *Eur J Immunol* 11: 317–323.
- Mayumi M (1992) EoL-1, a human eosinophilic cell line. *Leuk Lymphoma* 7: 243–250.
- Saito H, Bourinbaier A, Ginsburg M, Minato K, Ceresi E, et al. (1985). Establishment and characterization of a new human eosinophilic leukemia cell line. *Blood*. 66: 1233–1240.
- Wei Y, Epstein SP, Fukuoka S, Birmingham NP, Li XM, et al. (2011) sPLA2-IIa amplifies ocular surface inflammation in the experimental dry eye (DE) BALB/c mouse model. *Invest Ophthalmol Vis Sci* 52: 4780–4788.
- Tominaga T, Miyazaki D, Sasaki S, Mihara S, Komatsu N, et al. (2009) Blocking mast cell-mediated type I hypersensitivity in experimental allergic conjunctivitis by monocyte chemoattractant protein-1/CCR2. *Invest Ophthalmol Vis Sci* 50: 5181–5188.
- Hingoran M, Calder V, Jolly G, Buckley RJ, Lightman SL (1998) Eosinophil surface antigen expression and cytokine production vary in different ocular allergic diseases. *J Allergy Clin Immunol* 102: 821–830.
- Ingram JL, Kraft M (2012) IL-13 in asthma and allergic disease: asthma phenotypes and targeted therapies. *J Allergy Clin Immunol* 130: 829–842.
- Miyahara S, Miyahara N, Matsubara S, Takeda K, Koya T, et al. (2006) IL-13 is essential to the late-phase response in allergic rhinitis. *J Allergy Clin Immunol* 118: 1110–1116.
- Mannon P, Reinisch W (2012) Interleukin 13 and its role in gut defense and inflammation. *Gut* 61: 1765–1773.
- Oh MH, Oh SY, Yu J, Myers AC, Leonard WJ, et al. (2011) IL-13 induces skin fibrosis in atopic dermatitis by thymic stromal lymphopoietin. *J Immunol* 186: 7232–7242.
- Zheng T, Oh MH, Oh SY, Schroeder JT, Glick AB, et al. (2009) Transgenic expression of interleukin-13 in the skin induces a pruritic dermatitis and skin remodeling. *J Invest Dermatol* 129: 742–751.
- Matsuba-Kitamura S, Yoshimoto T, Yasuda K, Futatsugi-Yumikura S, Taki Y, et al. (2010) Contribution of IL-33 to induction and augmentation of experimental allergic conjunctivitis. *Int Immunol* 22: 479–489.
- Kim YH, Yang TY, Park CS, Ahn SH, Son BK, et al. (2012) Anti-IL-33 antibody has a therapeutic effect in a murine model of allergic rhinitis. *Allergy* 67: 183–190.
- Gu N, Kang G, Jin C, Xu Y, Zhang Z, et al. (2010) Intelectin is required for IL-13-induced monocyte chemotactic protein-1 and -3 expression in lung epithelial cells and promotes allergic airway inflammation. *Am J Physiol Lung Cell Mol Physiol* 298: L290–296.
- Lim EJ, Lu TX, Blanchard C, Rothenberg ME (2011) Epigenetic Regulation of the IL-13-induced Human Eotaxin-3 Gene by CREB-binding Protein-mediated Histone 3 Acetylation. *J Biol Chem* 286: 13193–13204.
- Matsukura S, Stellato C, Georas SN, Casolaro V, Plitt JR, et al. (2001) Interleukin-13 Upregulates Eotaxin Expression in Airway Epithelial Cells by a STAT6-Dependent Mechanism. *Am J Respir Cell Mol Biol* 24: 755–761.
- Pecaric-Petkovic T, Didichenko SA, Kaempfer S, Spiegl N, Dahinden CA (2009) Human basophils and eosinophils are the direct target leukocytes of the novel IL-1 family member IL-33. *Blood* 113: 1526–1534.
- Komai-Koma M, Xu D, Li Y, McKenzie AN, McInnes IB, et al. (2007) IL-33 is a chemoattractant for human Th2 cells. *Eur J Immunol* 7: 2779–2786.
- Hayat K, Asim MB, Nawaz M, Li M, Zhang L, et al. (2001) Ameliorative effect of thymoquinone on ovalbumin-induced allergic conjunctivitis in Balb/c mice. *Curr Eye Res* 36: 591–598.
- Chung SH, Choi SH, Choi JA, Chuck RS, Joo CK (2012) Curcumin suppresses ovalbumin-induced allergic conjunctivitis. *Mol Vis* 18: 966–972.
- Bundoc VG, Keane-Myers A (2007) IL-10 confers protection from mast cell degranulation in a mouse model of allergic conjunctivitis. *Exp Eye Res* 85: 575–579.
- Royer B, Varadarajalou S, Saas P, Guillosson JJ, Kantelip JP, et al. (2001) Inhibition of IgE-induced activation of human mast cells by IL-10. *Clin Exp Allergy* 31: 694–704.
- Li K, Liu X, Chen Z, Huang Q, Wu K (2010) Quantification of tear proteins and sPLA2-IIa alteration in patients with allergic conjunctivitis. *Mol Vision* 16: 2084–2091.
- Aho VV, Nevalainen TJ, Saari KM (2002) Group IIA phospholipase A2 content of tears in patients with keratoconjunctivitis sicca. *Graefes. Arch Clin Exp Ophthalmol* 40: 521–523.
- Chen D, Wei Y, Li X, Epstein S, Wolosin JM, et al. (2009) sPLA2-IIa is an inflammatory mediator when the ocular surface is compromised. *Exp Eye Res* 88: 880–888.
- Mould AW, Matthaei KI, Young IG, Foster PS (1997) Relationship between interleukin-5 and eotaxin in regulating blood and tissue eosinophilia in mice. *J Clin Invest* 99: 1064–1071.
- Murakami M, Hara N, Kudo I, Inoue K (1993) Triggering of degranulation in mast cells by exogenous type II phospholipase A2. *J Immunol* 151: 5675–5684.

## Author Contributions

Conceived and designed the experiments: MLN CM-G MH. Performed the experiments: CC BG RM PG-M. Analyzed the data: MLN CM-G MH CC BG RM PG-M. Contributed reagents/materials/analysis tools: MLN CM-G. Wrote the paper: MLN CM-G MH.
